# Supplementary material
Source: HighWire-hosted journal article supplement (http://ajnr-stage2.highwire.org/highwire/filestream/70996/field_highwire_adjunct_files/0/AN-19-00454_onl_print.pdf)
Supplement: AN-19-00454_onl_print.pdf [file AN-19-00454_onl_print.pdf]

**On-line Table 1: List of MR imaging indications and findings**

| List of MR Imaging Examination Indications per Study Subject              | List of MR Imaging Examination Findings per Study Subject |
|---------------------------------------------------------------------------|-----------------------------------------------------------|
| History of complicated birth with meconium aspiration                     | Structurally normal brain                                 |
| Macrocephaly with questionable echogenicity of right caudothalamic groove | Structurally normal brain                                 |
| Prematurity, dystonia, and tremors                                        | Structurally normal brain                                 |
| Developmental delay                                                       | Structurally normal brain                                 |
| Dystonia                                                                  | Structurally normal brain                                 |
| Cyanosis                                                                  | Structurally normal brain                                 |
| Congenital nystagmus                                                      | Structurally normal brain                                 |
| Hypoxemia and apnea of unclear etiology                                   | Structurally normal brain                                 |
| Developmental delay and dystonia                                          | Structurally normal brain                                 |
| Central apnea                                                             | Structurally normal brain                                 |
| Developmental delay                                                       | Structurally normal brain                                 |
| Prematurity and microcephaly                                              | Structurally normal brain                                 |
| Seizure                                                                   | Structurally normal brain                                 |
| Developmental delay and dystonia                                          | Structurally normal brain                                 |
| Seizures                                                                  | Structurally normal brain                                 |
| Developmental delay and macrocephaly                                      | Structurally normal brain                                 |
| Ataxia                                                                    | Structurally normal brain                                 |
| Prematurity, developmental delay, and possible seizure                    | Structurally normal brain                                 |
| Autism and developmental delay                                            | Structurally normal brain                                 |
| Headache                                                                  | Structurally normal brain                                 |
| Acute aphasia                                                             | Structurally normal brain                                 |
| Seizure                                                                   | Structurally normal brain                                 |
| Autism and developmental delay                                            | Structurally normal brain                                 |
| Seizure                                                                   | Structurally normal brain                                 |
| Headache                                                                  | Structurally normal brain                                 |
| Abnormal gait                                                             | Structurally normal brain                                 |
| Seizure                                                                   | Structurally normal brain                                 |
| Seizure                                                                   | Structurally normal brain                                 |
| Abnormal tremor and tic                                                   | Structurally normal brain                                 |
| Seizure, behavioral problems, and developmental delay                     | Structurally normal brain                                 |
| Ataxia                                                                    | Structurally normal brain                                 |
| Autism and microcephaly                                                   | Structurally normal brain                                 |
| Headache                                                                  | Structurally normal brain                                 |
| Headache                                                                  | Structurally normal brain                                 |
| Headache                                                                  | Structurally normal brain                                 |
| Seizure and developmental delay                                           | Structurally normal brain                                 |
| Headache                                                                  | Structurally normal brain                                 |
| Headache                                                                  | Structurally normal brain                                 |
| Developmental delay and microcephaly                                      | Structurally normal brain                                 |
| Headache                                                                  | Structurally normal brain                                 |
| Foot deformity and dystonia                                               | Structurally normal brain                                 |
| Dystonia                                                                  | Structurally normal brain                                 |
| Nasal dermoid                                                             | Structurally normal brain                                 |
| Seizure                                                                   | Structurally normal brain                                 |
| Headache                                                                  | Structurally normal brain                                 |
| Seizure                                                                   | Structurally normal brain                                 |
| Dystonia and developmental delay                                          | Structurally normal brain                                 |
| Dystonia                                                                  | Structurally normal brain                                 |
| Dizziness                                                                 | Structurally normal brain                                 |
| Tinnitus                                                                  | Structurally normal brain                                 |
| Headache                                                                  | Structurally normal brain                                 |
| Headache                                                                  | Structurally normal brain                                 |
| Abnormal vision                                                           | Structurally normal brain                                 |
| Autism                                                                    | Structurally normal brain                                 |
| Headache                                                                  | Structurally normal brain                                 |
| Seizure                                                                   | Structurally normal brain                                 |
| Rule out malformation                                                     | Structurally normal brain                                 |
| Headache                                                                  | Structurally normal brain                                 |
| Concussion                                                                | Structurally normal brain                                 |
| Abnormal balance and muscle tone                                          | Structurally normal brain                                 |
| Developmental delay, seizure, and abnormal balance                        | Structurally normal brain                                 |
| Developmental delay                                                       | Structurally normal brain                                 |

*Continued on next page*

**On-line Table 1: Continued**

| List of MR Imaging Examination Indications per Study Subject | List of MR Imaging Examination Findings per Study Subject |
|--------------------------------------------------------------|-----------------------------------------------------------|
| Headache                                                     | Structurally normal brain                                 |
| Headache                                                     | Structurally normal brain                                 |
| Headache                                                     | Structurally normal brain                                 |
| Seizure                                                      | Structurally normal brain                                 |
| Headache                                                     | Structurally normal brain                                 |
| Headache                                                     | Structurally normal brain                                 |
| Headache                                                     | Structurally normal brain                                 |
| Central apnea                                                | Structurally normal brain                                 |
| Seizure                                                      | Structurally normal brain                                 |
| Headache                                                     | Structurally normal brain                                 |
| Abnormal tremor                                              | Structurally normal brain                                 |
| Headache                                                     | Structurally normal brain                                 |
| Concussion                                                   | Structurally normal brain                                 |
| Dizziness                                                    | Structurally normal brain                                 |
| Seizure                                                      | Structurally normal brain                                 |
| Headache                                                     | Structurally normal brain                                 |
| Headache                                                     | Structurally normal brain                                 |
| Seizure                                                      | Structurally normal brain                                 |
| Developmental delay                                          | Structurally normal brain                                 |
| Concussion                                                   | Structurally normal brain                                 |
| Seizure                                                      | Structurally normal brain                                 |
| Headache                                                     | Structurally normal brain                                 |
| Headache                                                     | Structurally normal brain                                 |
| Headache                                                     | Structurally normal brain                                 |
| Seizure                                                      | Structurally normal brain                                 |
| History of atrophy                                           | Structurally normal brain                                 |
| Macrocephaly and developmental delay                         | Structurally normal brain                                 |
| Headache                                                     | Structurally normal brain                                 |
| Headache                                                     | Structurally normal brain                                 |
| Headache                                                     | Structurally normal brain                                 |
| Headache, dizziness, and paresthesias                        | Structurally normal brain                                 |
| Abnormal behavior                                            | Structurally normal brain                                 |
| Headache and seizure                                         | Structurally normal brain                                 |
| Headache                                                     | Structurally normal brain                                 |
| Developmental delay                                          | Structurally normal brain                                 |
| Headache                                                     | Structurally normal brain                                 |
| Abnormal movement and speech                                 | Structurally normal brain                                 |
| Headache                                                     | Structurally normal brain                                 |
| Headache                                                     | Structurally normal brain                                 |
| Headache                                                     | Structurally normal brain                                 |
| Seizure                                                      | Structurally normal brain                                 |
| Abnormal tremor                                              | Structurally normal brain                                 |
| Headache                                                     | Structurally normal brain                                 |

On-line Table 2: Age parameter estimates from linear spline models

| ROI             | Before 36 Months |             |         | After 36 Months |               |         | Difference |                   |         |
|-----------------|------------------|-------------|---------|-----------------|---------------|---------|------------|-------------------|---------|
|                 | Estimate         | 95% CI      | P Value | Estimate        | 95% CI        | P Value | Estimate   | 95% CI            | P Value |
| Globus pallidus | 0.019            | 0.012–0.026 | <.001   | 0.002           | 0.001–0.003   | <.001   | –0.017     | –0.025 to –0.009  | <.001   |
| Thalamus        | 0.013            | 0.006–0.02  | <.001   | 0.001           | –0.0001–0.002 | .08     | –0.012     | –0.02 to –0.005   | .002    |
| Dentate         | 0.011            | 0.004–0.019 | .006    | 0.001           | –0.0002–0.002 | .11     | –0.011     | –0.0187 to –0.002 | .01     |
| Frontal GM      | 0.007            | 0.001–0.012 | .02     | 0.0004          | –0.0003–0.001 | .26     | –0.006     | –0.012 to –0.0002 | .04     |
| Frontal WM      | 0.028            | 0.02–0.036  | <.001   | 0.0005          | –0.0005–0.001 | .34     | –0.028     | –0.036 to –0.019  | <.001   |

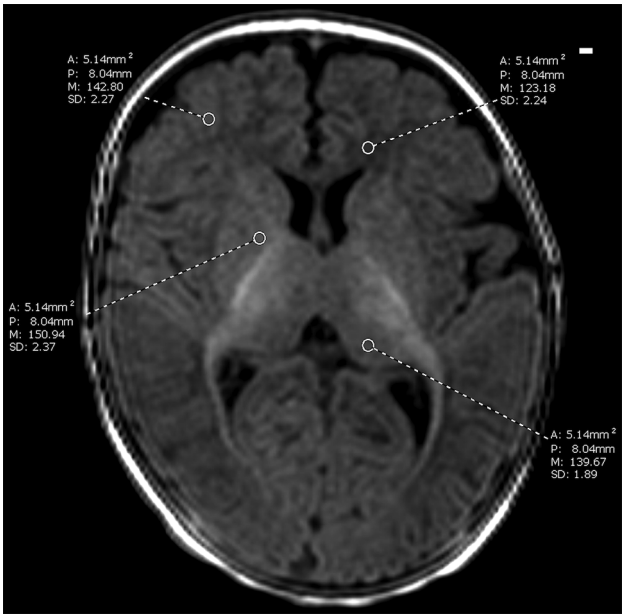

ON-LINE FIG 1. Representative ROI measurement, globus pallidus, thalamus, and frontal lobe cortex and subcortical white matter, infant.

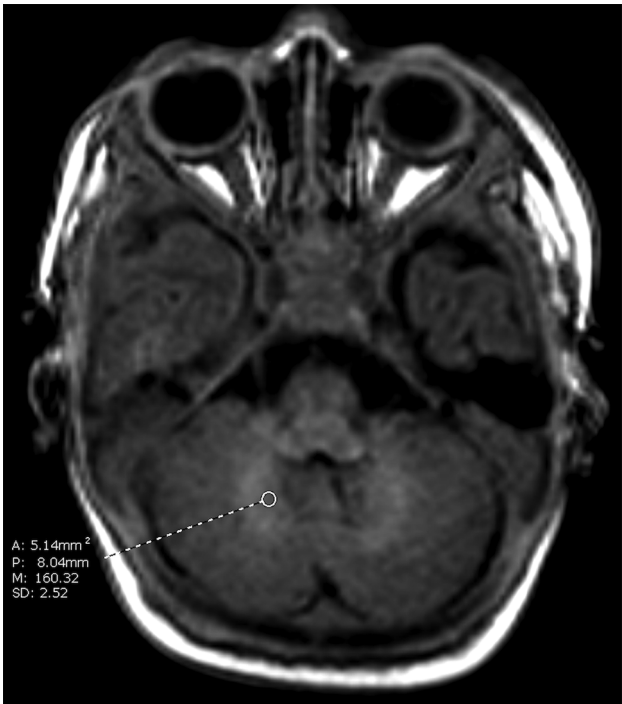

ON-LINE FIG 2. Representative ROI measurement, dentate nucleus, infant.

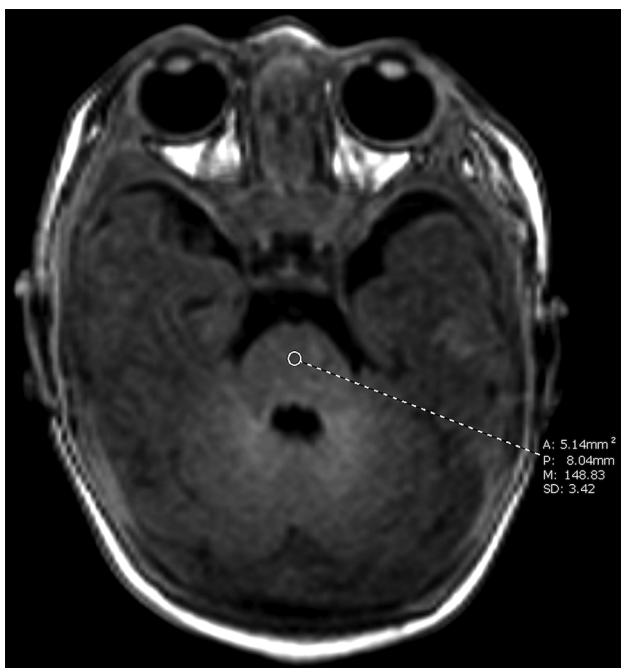

**ON-LINE FIG 3.** Representative ROI measurement, pons, infant.

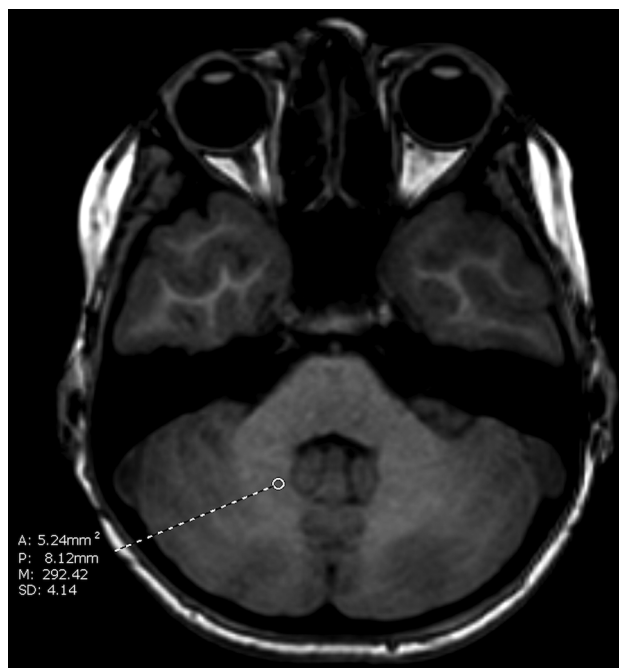

**ON-LINE FIG 5.** Representative ROI measurement, dentate nucleus, school age (10 years of age).

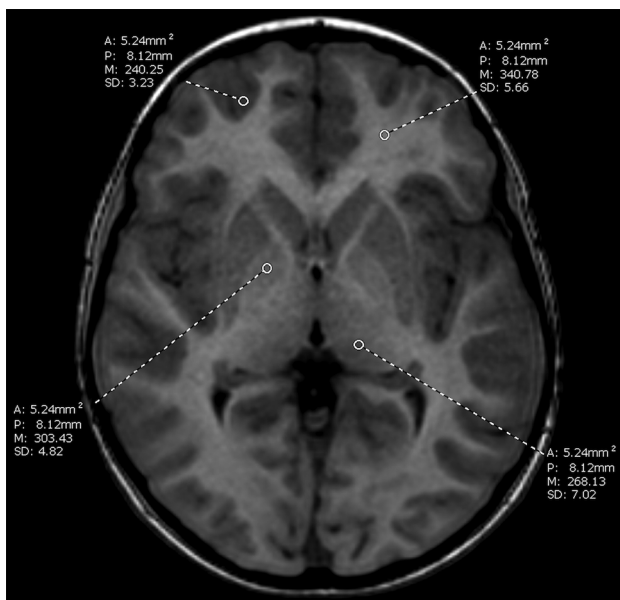

**ON-LINE FIG 4.** Representative ROI measurement, globus pallidus, thalamus, and frontal lobe cortex and subcortical white matter, school age (10 years of age).

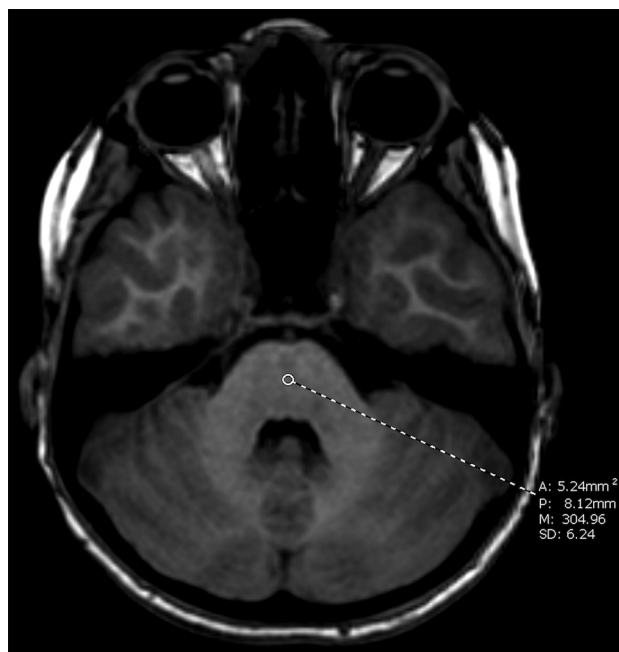

**ON-LINE FIG 6.** Representative ROI measurement, pons, school age (10 years of age).

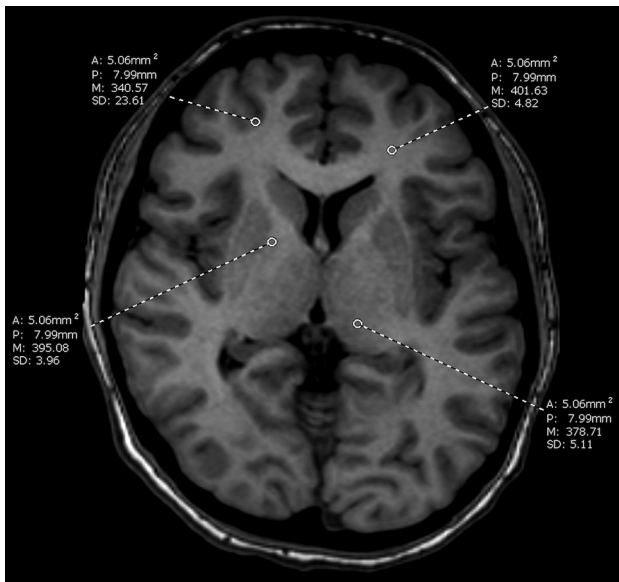

**ON-LINE FIG 7.** Representative ROI measurement, globus pallidus, thalamus, and frontal lobe cortex and subcortical white matter, older adolescent (17 years of age).

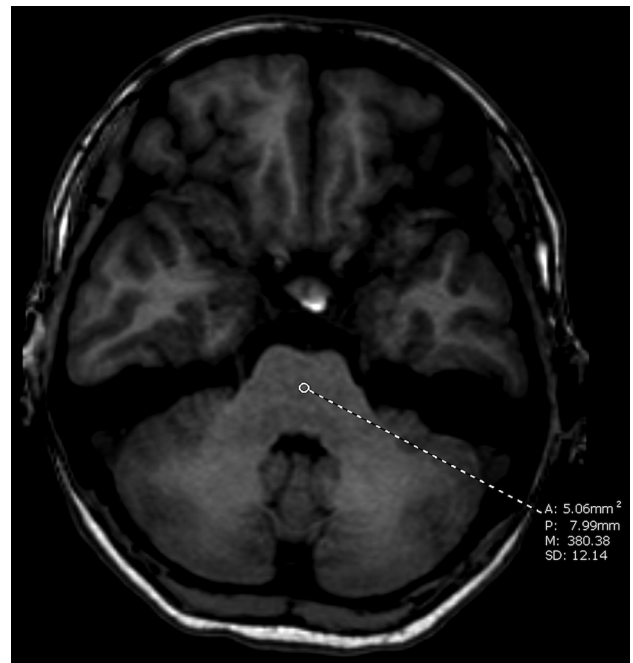

**ON-LINE FIG 9.** Representative ROI measurement, pons, older adolescent (17 years of age).

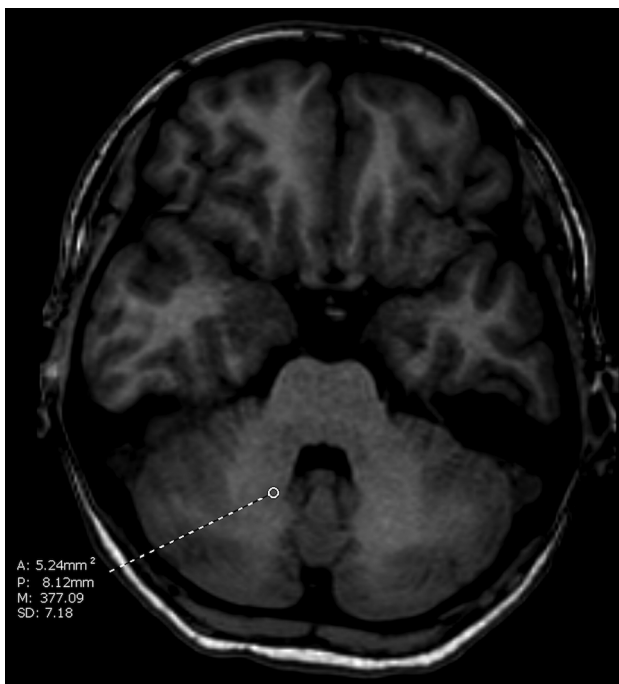

**ON-LINE FIG 8.** Representative ROI measurement, dentate nucleus, older adolescent (17 years of age).
